# Supplementary material
Source: publisher figshare collection journal article supplement (https://acs.figshare.com/ndownloader/files/4088422)

# checkCIF/PLATON report

Structure factors have been supplied for datablock(s) cs3\_30

No syntax errors found.      CIF dictionary      Interpreting this report

## Datablock: cs3\_30

---

|                 |                          |                    |             |
|-----------------|--------------------------|--------------------|-------------|
| Bond precision: | C-C = 0.0034 Å           | Wavelength=0.71073 |             |
| Cell:           | a=14.430(6)              | b=6.760(2)         | c=16.620(8) |
|                 | alpha=90                 | beta=99.490(16)    | gamma=90    |
| Temperature:    | 30 K                     |                    |             |
|                 | Calculated               | Reported           |             |
| Volume          | 1599.0(11)               | 1599.0(11)         |             |
| Space group     | P 21/c                   | P21/c              |             |
| Hall group      | -P 2ybc                  | ?                  |             |
| Moiety formula  | C9 H11 N O2, C7 H4 N2 O6 | ?                  |             |
| Sum formula     | C16 H15 N3 O8            | C16 H15 N3 O8      |             |
| Mr              | 377.31                   | 377.31             |             |
| Dx,g cm-3       | 1.567                    | 1.567              |             |
| Z               | 4                        | 4                  |             |
| Mu (mm-1)       | 0.128                    | 0.002              |             |
| F000            | 784.0                    | 499.0              |             |
| F000'           | 784.49                   |                    |             |
| h,k,lmax        |                          | 19,9,21            |             |
| Nref            |                          | 3262               |             |
| Tmin,Tmax       | 0.998,0.999              |                    |             |
| Tmin'           | 0.996                    |                    |             |

Correction method= Not given

Data completeness=      Theta(max)= 0.000

R(reflections)= 0.0668( 2235)      wR2(reflections)= 0.1416( 3262)

S = 1.264      Npar= 380

---

The following ALERTS were generated. Each ALERT has the format

**test-name\_ALERT\_alert-type\_alert-level.**

Click on the hyperlinks for more details of the test.

---

### Alert level A

TYPE031\_ALERT\_1\_A \_diffn\_radiation\_wavelength is not of type numb.

DIFMN02\_ALERT\_2\_A The minimum difference density is < -0.1\*ZMAX\*2.00

\_refine\_diff\_density\_min given = -3.107

Test value = -1.600

DIFMX01\_ALERT\_2\_A The maximum difference density is > 0.1\*ZMAX\*2.00  
 \_refine\_diff\_density\_max given = 2.913  
 Test value = 1.600  
 RINTA01\_ALERT\_3\_A The value of Rint is greater than 0.25  
 Rint given 0.259  
 PLAT029\_ALERT\_3\_A \_diffn\_measured\_fraction\_theta\_full Low ..... 0.000  
 PLAT051\_ALERT\_1\_A Mu(calc) and Mu(CIF) Ratio Differs from 1.0 by . 6306.00 Perc.  
 PLAT091\_ALERT\_1\_A No Wavelength found in CIF - 0.71073 Ang Assumed ?  
 PLAT097\_ALERT\_2\_A Large Reported Max. (Positive) Residual Density 2.91 eA-3  
 PLAT098\_ALERT\_2\_A Large Reported Min. (Negative) Residual Density -3.11 eA-3  
 PLAT213\_ALERT\_2\_A Atom O7 has ADP max/min Ratio ..... 6.6 prola  
 PLAT213\_ALERT\_2\_A Atom O8 has ADP max/min Ratio ..... 9.6 prola

### Alert level B

PLAT220\_ALERT\_2\_B Large Non-Solvent O Ueq(max)/Ueq(min) ... 9.4 Ratio  
 PLAT250\_ALERT\_2\_B Large U3/U1 Ratio for Average U(i,j) Tensor ... 4.4

### Alert level C

DIFMN03\_ALERT\_1\_C The minimum difference density is < -0.1\*ZMAX\*0.75  
 The relevant atom site should be identified.  
 DIFMX02\_ALERT\_1\_C The maximum difference density is > 0.1\*ZMAX\*0.75  
 The relevant atom site should be identified.  
 PLAT068\_ALERT\_1\_C Reported F000 Differs from Calcd (or Missing)... ?  
 PLAT088\_ALERT\_3\_C Poor Data / Parameter Ratio ..... 8.58  
 PLAT213\_ALERT\_2\_C Atom H5 has ADP max/min Ratio ..... 3.1 prola  
 PLAT242\_ALERT\_2\_C Check Low Ueq as Compared to Neighbors for N3  
 PLAT355\_ALERT\_3\_C Long O-H Bond (0.82A) O1 - H11 ... 1.02 Ang.

### Alert level G

ABSMU\_01 Radiation type not identified. Calculation of  
 \_exptl\_absorpt\_correction\_mu not performed.  
 PLAT005\_ALERT\_5\_G No \_iucr\_refine\_instructions\_details in CIF .... ?  
 PLAT063\_ALERT\_4\_G Crystal Size Likely too Large for Beam Size .... 1.80 mm  
 PLAT180\_ALERT\_4\_G Check Cell Rounding: # of Values Ending with 0 = 4  
 PLAT195\_ALERT\_1\_G Missing \_cell\_measurement\_theta\_max datum .... ?  
 PLAT196\_ALERT\_1\_G Missing \_cell\_measurement\_theta\_min datum .... ?  
 PLAT981\_ALERT\_1\_G No non-zero f" Anomalous Scattering Values Found ?  
 PLAT982\_ALERT\_1\_G The C-f'= 0.000 Deviates from the IT-value 0.003  
 PLAT982\_ALERT\_1\_G The N-f'= 0.000 Deviates from the IT-value 0.006  
 PLAT982\_ALERT\_1\_G The O-f'= 0.000 Deviates from the IT-value 0.011  
 PLAT983\_ALERT\_1\_G The C-f"= 0.000 Deviates from the IT-Value 0.002  
 PLAT983\_ALERT\_1\_G The N-f"= 0.000 Deviates from the IT-Value 0.003  
 PLAT983\_ALERT\_1\_G The O-f"= 0.000 Deviates from the IT-Value 0.006

- 
- 11 **ALERT level A** = Most likely a serious problem - resolve or explain  
 2 **ALERT level B** = A potentially serious problem, consider carefully  
 7 **ALERT level C** = Check. Ensure it is not caused by an omission or oversight  
 12 **ALERT level G** = General information/check it is not something unexpected

- 15 ALERT type 1 CIF construction/syntax error, inconsistent or missing data  
 10 ALERT type 2 Indicator that the structure model may be wrong or deficient  
 4 ALERT type 3 Indicator that the structure quality may be low  
 2 ALERT type 4 Improvement, methodology, query or suggestion  
 1 ALERT type 5 Informative message, check
-

It is advisable to attempt to resolve as many as possible of the alerts in all categories. Often the minor alerts point to easily fixed oversights, errors and omissions in your CIF or refinement strategy, so attention to these fine details can be worthwhile. In order to resolve some of the more serious problems it may be necessary to carry out additional measurements or structure refinements. However, the purpose of your study may justify the reported deviations and the more serious of these should normally be commented upon in the discussion or experimental section of a paper or in the "special\_details" fields of the CIF. checkCIF was carefully designed to identify outliers and unusual parameters, but every test has its limitations and alerts that are not important in a particular case may appear. Conversely, the absence of alerts does not guarantee there are no aspects of the results needing attention. It is up to the individual to critically assess their own results and, if necessary, seek expert advice.

### **Publication of your CIF in IUCr journals**

A basic structural check has been run on your CIF. These basic checks will be run on all CIFs submitted for publication in IUCr journals (*Acta Crystallographica*, *Journal of Applied Crystallography*, *Journal of Synchrotron Radiation*); however, if you intend to submit to *Acta Crystallographica Section C* or *E*, you should make sure that full publication checks are run on the final version of your CIF prior to submission.

### **Publication of your CIF in other journals**

Please refer to the *Notes for Authors* of the relevant journal for any special instructions relating to CIF submission.

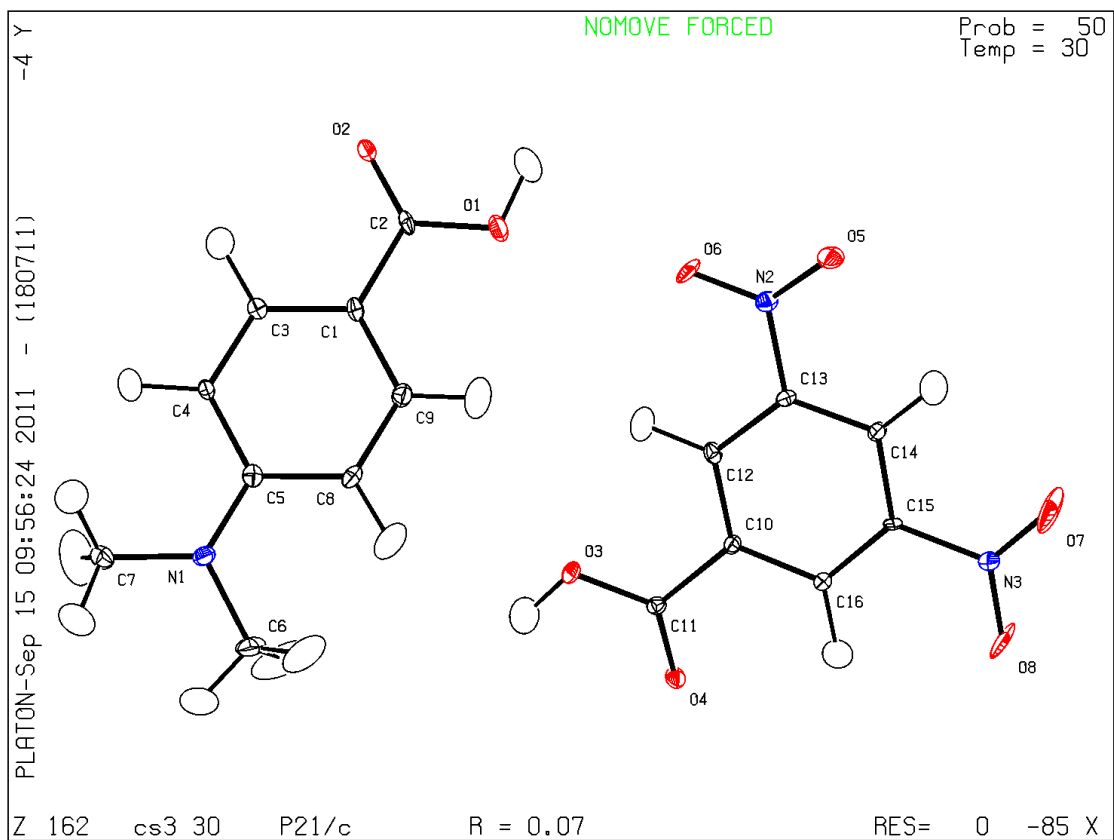

Supplement: Supplementary file 1 [file 4088422 › 4-DABA_35-DNBA_30K_neutron_report.pdf]
