# Supplementary material
Source: publisher figshare collection journal article supplement (https://acs.figshare.com/ndownloader/files/4088422)

# checkCIF/PLATON report

Structure factors have been supplied for datablock(s) cs3\_250

No syntax errors found.      CIF dictionary      Interpreting this report

## Datablock: cs3\_250

---

|                 |                          |                               |
|-----------------|--------------------------|-------------------------------|
| Bond precision: | C-C = 0.0041 A           | Wavelength=0.71073            |
| Cell:           | a=14.430(6)              | b=6.910(2)      c=16.880(8)   |
|                 | alpha=90                 | beta=99.590(16)      gamma=90 |
| Temperature:    | 250 K                    |                               |
|                 | Calculated               | Reported                      |
| Volume          | 1659.6(12)               | 1659.6(12)                    |
| Space group     | P 21/c                   | P21/c                         |
| Hall group      | -P 2ybc                  | ?                             |
| Moiety formula  | C9 H11 N O2, C7 H4 N2 O6 | ?                             |
| Sum formula     | C16 H15 N3 O8            | C16 H15 N3 O8                 |
| Mr              | 377.31                   | 377.31                        |
| Dx,g cm-3       | 1.510                    | 1.510                         |
| Z               | 4                        | 4                             |
| Mu (mm-1)       | 0.123                    | 0.002                         |
| F000            | 784.0                    | 499.0                         |
| F000'           | 784.49                   |                               |
| h,k,lmax        |                          | 16,8,19                       |
| Nref            |                          | 2135                          |
| Tmin,Tmax       | 0.998,0.999              |                               |
| Tmin'           | 0.996                    |                               |

Correction method= Not given

Data completeness=      Theta(max)= 0.000

R(reflections)= 0.0530( 1410)      wR2(reflections)= 0.1036( 2135)

S = 1.354      Npar= 378

---

The following ALERTS were generated. Each ALERT has the format

**test-name\_ALERT\_alert-type\_alert-level.**

Click on the hyperlinks for more details of the test.

---

### Alert level A

TYPE031\_ALERT\_1\_A \_diffn\_radiation\_wavelength is not of type numb.

RINTA01\_ALERT\_3\_A The value of Rint is greater than 0.25

Rint given 0.267

PLAT029\_ALERT\_3\_A \_diffn\_measured\_fraction\_theta\_full Low ..... 0.000

|                                                                    |               |
|--------------------------------------------------------------------|---------------|
| PLAT051_ALERT_1_A Mu(calc) and Mu(CIF) Ratio Differs from 1.0 by . | 6072.09 Perc. |
| PLAT088_ALERT_3_A Poor Data / Parameter Ratio .....                | 5.65          |
| PLAT091_ALERT_1_A No Wavelength found in CIF - 0.71073 Ang Assumed | ?             |

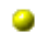

### Alert level C

|                                                                    |            |
|--------------------------------------------------------------------|------------|
| PLAT068_ALERT_1_C Reported F000 Differs from Calcd (or Missing)... | ?          |
| PLAT242_ALERT_2_C Check Low Ueq as Compared to Neighbors for       | N3         |
| PLAT250_ALERT_2_C Large U3/U1 Ratio for Average U(i,j) Tensor .... | 2.3        |
| PLAT340_ALERT_3_C Low Bond Precision on C-C Bonds .....            | 0.0041 Ang |

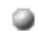

### Alert level G

ABSMU\_01 Radiation type not identified. Calculation of  
\_exptl\_absorpt\_correction\_mu not performed.

|                                                                    |         |
|--------------------------------------------------------------------|---------|
| PLAT005_ALERT_5_G No _iucr_refine_instructions_details in CIF .... | ?       |
| PLAT063_ALERT_4_G Crystal Size Likely too Large for Beam Size .... | 1.80 mm |
| PLAT180_ALERT_4_G Check Cell Rounding: # of Values Ending with 0 = | 4       |
| PLAT195_ALERT_1_G Missing _cell_measurement_theta_max datum ....   | ?       |
| PLAT196_ALERT_1_G Missing _cell_measurement_theta_min datum ....   | ?       |
| PLAT981_ALERT_1_G No non-zero f" Anomalous Scattering Values Found | ?       |
| PLAT982_ALERT_1_G The C-f' = 0.000 Deviates from the IT-value      | 0.003   |
| PLAT982_ALERT_1_G The N-f' = 0.000 Deviates from the IT-value      | 0.006   |
| PLAT982_ALERT_1_G The O-f' = 0.000 Deviates from the IT-value      | 0.011   |
| PLAT983_ALERT_1_G The C-f" = 0.000 Deviates from the IT-Value      | 0.002   |
| PLAT983_ALERT_1_G The N-f" = 0.000 Deviates from the IT-Value      | 0.003   |
| PLAT983_ALERT_1_G The O-f" = 0.000 Deviates from the IT-Value      | 0.006   |

- 
- 6 **ALERT level A** = Most likely a serious problem - resolve or explain  
0 **ALERT level B** = A potentially serious problem, consider carefully  
4 **ALERT level C** = Check. Ensure it is not caused by an omission or oversight  
12 **ALERT level G** = General information/check it is not something unexpected
- 13 ALERT type 1 CIF construction/syntax error, inconsistent or missing data  
2 ALERT type 2 Indicator that the structure model may be wrong or deficient  
4 ALERT type 3 Indicator that the structure quality may be low  
2 ALERT type 4 Improvement, methodology, query or suggestion  
1 ALERT type 5 Informative message, check
-

It is advisable to attempt to resolve as many as possible of the alerts in all categories. Often the minor alerts point to easily fixed oversights, errors and omissions in your CIF or refinement strategy, so attention to these fine details can be worthwhile. In order to resolve some of the more serious problems it may be necessary to carry out additional measurements or structure refinements. However, the purpose of your study may justify the reported deviations and the more serious of these should normally be commented upon in the discussion or experimental section of a paper or in the "special\_details" fields of the CIF. checkCIF was carefully designed to identify outliers and unusual parameters, but every test has its limitations and alerts that are not important in a particular case may appear. Conversely, the absence of alerts does not guarantee there are no aspects of the results needing attention. It is up to the individual to critically assess their own results and, if necessary, seek expert advice.

### **Publication of your CIF in IUCr journals**

A basic structural check has been run on your CIF. These basic checks will be run on all CIFs submitted for publication in IUCr journals (*Acta Crystallographica*, *Journal of Applied Crystallography*, *Journal of Synchrotron Radiation*); however, if you intend to submit to *Acta Crystallographica Section C* or *E*, you should make sure that full publication checks are run on the final version of your CIF prior to submission.

### **Publication of your CIF in other journals**

Please refer to the *Notes for Authors* of the relevant journal for any special instructions relating to CIF submission.

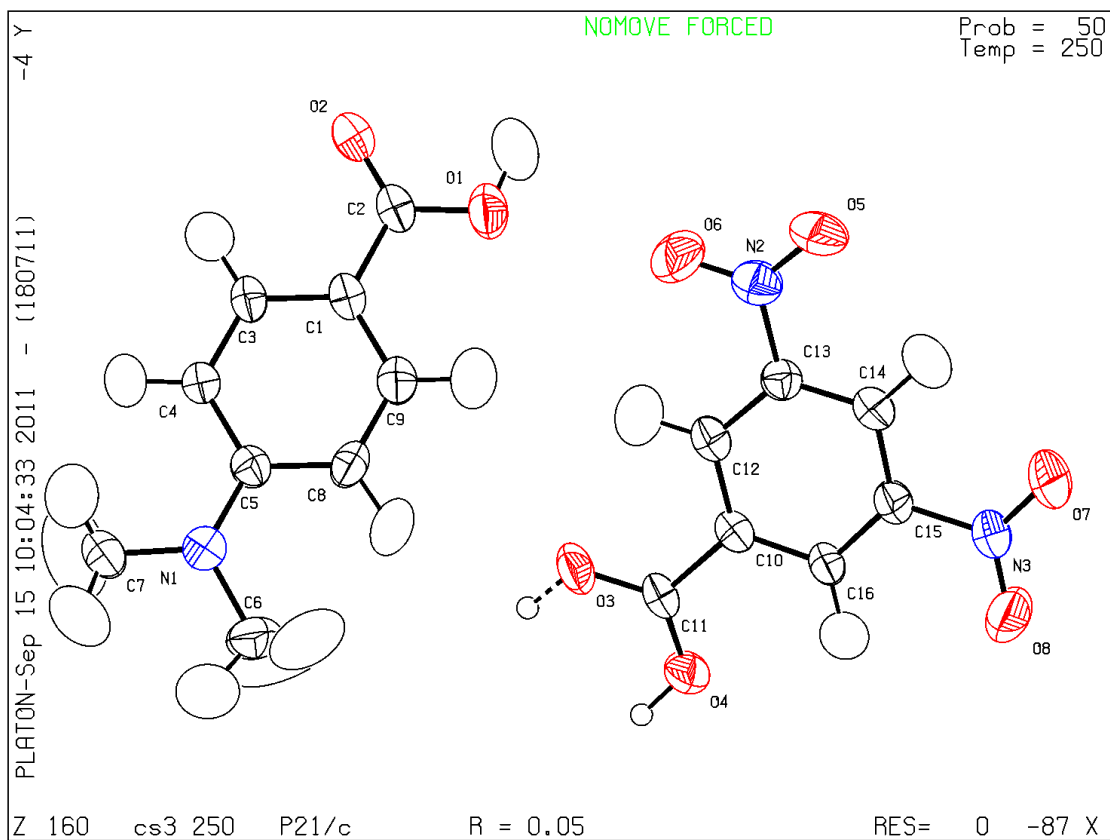

Supplement: Supplementary file 1 [file 4088422 › 4-DABA_35-DNBA_250K_neutron_disorder_report.pdf]
