# Supplementary material
Source: publisher figshare collection journal article supplement (https://acs.figshare.com/ndownloader/files/4088422)
Supplement: Supplementary file 1 [file 4088422]

Archive with 12 entries (12 files):
- 4-DABA_35-DNBA_250K_neutron_disorder_report.pdf
- 4-DABA_35-DNBA_250K_neutron_disordered_CIF.cif
- 4-DABA_35-DNBA_300K_neutron_CIF.cif
- 4-DABA_35-DNBA_300K_neutron_report.pdf
- 4-DABA_35-DNBA_30K_neutron_CIF.cif
- 4-DABA_35-DNBA_30K_neutron_report.pdf
- 4-DABA_35-DNBA_100K__neutron_disordered_CIF.cif
- 4-DABA_35-DNBA_100K_neutron_disordered_report.pdf
- 4-DABA_35-DNBA_150K_neutron_disorder_report.pdf
- 4-DABA_35-DNBA_150K_neutron_disordered_CIF.cif
- 4-DABA_35-DNBA_200K_neutron_disorder_report.pdf
- 4-DABA_35-DNBA_200K_neutron_disordered_CIF.cif
