# Supplementary material
Source: publisher figshare collection journal article supplement (https://acs.figshare.com/ndownloader/files/4088422)
Supplement: Supplementary file 1 [file 4088422 › 4-DABA_35-DNBA_150K_neutron_disordered_CIF.cif]

 
data_cs3_150

_audit_update_record
;
2011-09-14 # Formatted by publCIF
;
 
_audit_creation_method            SHELXL-97
_chemical_name_systematic
;
 4-dimethylaminobenzoic acid 3,5-dinitrobenzoic acid
;
_chemical_name_common             
;
 4-dimethylaminobenzoic acid 3,5-dinitrobenzoic acid
;
_chemical_melting_point           ?
_chemical_formula_moiety          ?
_chemical_formula_sum
 'C16 H15 N3 O8'
_chemical_formula_weight          377.31
 
loop_
 _atom_type_symbol
 _atom_type_description
 _atom_type_scat_dispersion_real
 _atom_type_scat_dispersion_imag
 _atom_type_scat_source
 'C'  'C'   0.0000   0.0000
 'International Tables Vol C Tables 4.2.6.8 and 6.1.1.4'
 'H'  'H'   0.0000   0.0000
 'International Tables Vol C Tables 4.2.6.8 and 6.1.1.4'
 'N'  'N'   0.0000   0.0000
 'International Tables Vol C Tables 4.2.6.8 and 6.1.1.4'
 'O'  'O'   0.0000   0.0000
 'International Tables Vol C Tables 4.2.6.8 and 6.1.1.4'
 
_symmetry_cell_setting            monoclinic
_symmetry_space_group_name_H-M    P21/c
 
loop_
 _symmetry_equiv_pos_as_xyz
 'x, y, z'
 '-x, y+1/2, -z+1/2'
 '-x, -y, -z'
 'x, -y-1/2, z-1/2'
 
_cell_length_a                    14.473(6)
_cell_length_b                    6.872(2)
_cell_length_c                    16.755(8)
_cell_angle_alpha                 90.00
_cell_angle_beta                  99.721(16)
_cell_angle_gamma                 90.00
_cell_volume                      1642.5(11)
_cell_formula_units_Z             4
_cell_measurement_temperature     150
_cell_measurement_reflns_used     250
 
_exptl_crystal_description        'block'
_exptl_crystal_colour             'orange'
_exptl_crystal_size_max           1.8
_exptl_crystal_size_mid           0.9
_exptl_crystal_size_min           0.5
_exptl_crystal_density_meas       ?
_exptl_crystal_density_diffrn     1.526
_exptl_crystal_density_method     'not measured'
_exptl_crystal_F_000              499
_exptl_absorpt_coefficient_mu     0.002
_exptl_absorpt_correction_type    'none'
 
_exptl_special_details
;
For peak integration a local UB matrix was refined for each pattern, 
using approximately 250 reflections.
Hence _cell_measurement_reflns_used      250

Because of the nature of the experiment, it is not possible to give values of
theta_min and theta_max for the cell determination.

The same applies for the wavelength used for the experiment.
The range of wavelengths used was 0.8-5.2 Angstroms.
;
 
_diffrn_ambient_temperature       150
_diffrn_radiation_wavelength      0.80-5.20
_diffrn_radiation_type            'neutron'
_diffrn_radiation_source          'ILL reactor source, thermal guide'
_diffrn_radiation_monochromator   'none'
_diffrn_measurement_device_type   'VIVALDI'
_diffrn_measurement_method        'Laue patterns at 10 orientations'
_diffrn_detector_area_resol_mean  0.7
_diffrn_standards_number          'none'
_diffrn_reflns_number             13051
_diffrn_reflns_av_R_equivalents   0.2740
_diffrn_reflns_av_sigmaI/netI     0.1460
_diffrn_reflns_limit_h_min        -18
_diffrn_reflns_limit_h_max        16
_diffrn_reflns_limit_k_min        -8
_diffrn_reflns_limit_k_max        8
_diffrn_reflns_limit_l_min        -20
_diffrn_reflns_limit_l_max        20
_reflns_number_total              2721
_reflns_number_gt                 1700
_reflns_threshold_expression      >2\s(I)
 
_computing_data_collection        'VIVALDI (MAATEL)'
_computing_cell_refinement        'lauegen (CCP4)'
_computing_data_reduction         'argonne_boxes, laue4 (Piltz, 2011)'
_computing_structure_solution     ?
_computing_structure_refinement   'SHELXL-97 (Sheldrick, 2008)'
_computing_molecular_graphics     'Mercury (McRae, 2006)'
_computing_publication_material   'WINGX (Farrugia, 1999)'
 
_refine_special_details
;
The variable wavelength nature of the data collection procedure means that
meaningful values of _diffrn_reflns_theta_min & _diffrn_reflns_theta_max
cannot be given instead the following limits are given

_diffrn_reflns_sin(theta)/lambda_min  0.03 
_diffrn_reflns_sin(theta)/lambda_max  0.64  

_refine_diff_density_max/min is given in Fermi per Angstrom cubed not
electrons per angstrom cubed. 

 Refinement of F^2^ against ALL reflections.  The weighted R-factor wR and
 goodness of fit S are based on F^2^, conventional R-factors R are based
 on F, with F set to zero for negative F^2^. The threshold expression of
 F^2^ > 2\s(F^2^) is used only for calculating R-factors(gt) etc. and is
 not relevant to the choice of reflections for refinement.  R-factors based
 on F^2^ are statistically about twice as large as those based on F, and R-
 factors based on ALL data will be even larger.
;
 
_refine_ls_structure_factor_coef  Fsqd
_refine_ls_matrix_type            full
_refine_ls_weighting_scheme       calc
_refine_ls_weighting_details
 'calc w=1/[\s^2^(Fo^2^)+(0.0300P)^2^+0.0000P] where P=(Fo^2^+2Fc^2^)/3'
_atom_sites_solution_primary      direct
_atom_sites_solution_secondary    difmap
_atom_sites_solution_hydrogens    difmap
_refine_ls_hydrogen_treatment     mixed
_refine_ls_extinction_method      none
_refine_ls_number_reflns          2721
_refine_ls_number_parameters      378
_refine_ls_number_restraints      0
_refine_ls_R_factor_all           0.1132
_refine_ls_R_factor_gt            0.0537
_refine_ls_wR_factor_ref          0.1157
_refine_ls_wR_factor_gt           0.1015
_refine_ls_goodness_of_fit_ref    1.080
_refine_ls_restrained_S_all       1.080
_refine_ls_shift/su_max           0.000
_refine_ls_shift/su_mean          0.000
 
loop_
 _atom_site_label
 _atom_site_type_symbol
 _atom_site_fract_x
 _atom_site_fract_y
 _atom_site_fract_z
 _atom_site_U_iso_or_equiv
 _atom_site_adp_type
 _atom_site_occupancy
 _atom_site_symmetry_multiplicity
 _atom_site_calc_flag
 _atom_site_refinement_flags
 _atom_site_disorder_assembly
 _atom_site_disorder_group
C1 C 0.64157(15) 0.6568(3) 0.87167(16) 0.0220(5) Uani 1 1 d . . .
C2 C 0.58004(15) 0.5897(3) 0.92707(16) 0.0228(5) Uani 1 1 d . . .
O1 O 0.4898(2) 0.5959(5) 0.8987(2) 0.0347(8) Uani 1 1 d . . .
O2 O 0.6105(2) 0.5296(5) 0.9954(2) 0.0294(7) Uani 1 1 d . . .
C3 C 0.73821(15) 0.6747(4) 0.89881(16) 0.0210(5) Uani 1 1 d . . .
C4 C 0.79848(18) 0.7342(3) 0.84675(17) 0.0187(6) Uani 1 1 d . . .
C5 C 0.76381(19) 0.7778(4) 0.76523(19) 0.0202(6) Uani 1 1 d . . .
N1 N 0.82218(12) 0.8446(3) 0.71493(11) 0.0255(4) Uani 1 1 d . . .
C6 C 0.7901(2) 0.8517(5) 0.62811(19) 0.0391(7) Uani 1 1 d . . .
C7 C 0.92285(18) 0.8456(5) 0.73998(18) 0.0311(6) Uani 1 1 d . . .
C8 C 0.66617(19) 0.7594(4) 0.73847(18) 0.0279(6) Uani 1 1 d . . .
C9 C 0.60673(17) 0.6994(4) 0.79066(17) 0.0272(6) Uani 1 1 d . . .
C10 C 0.30442(14) 0.6460(3) 0.57236(14) 0.0190(5) Uani 1 1 d . . .
C11 C 0.39081(15) 0.5841(3) 0.54105(15) 0.0210(5) Uani 1 1 d . . .
O3 O 0.46896(19) 0.6042(4) 0.58750(19) 0.0288(7) Uani 1 1 d . . .
O4 O 0.3818(2) 0.5144(4) 0.4715(2) 0.0270(7) Uani 1 1 d . . .
C12 C 0.30933(15) 0.6855(3) 0.65458(15) 0.0204(5) Uani 1 1 d . . .
C13 C 0.22763(19) 0.7381(3) 0.68247(17) 0.0211(6) Uani 1 1 d . . .
N2 N 0.23238(15) 0.7816(3) 0.76898(14) 0.0276(4) Uani 1 1 d . . .
O5 O 0.1608(2) 0.8414(6) 0.7909(2) 0.0371(8) Uani 1 1 d . . .
O6 O 0.3063(3) 0.7569(5) 0.8132(2) 0.0398(9) Uani 1 1 d . . .
C14 C 0.1419(2) 0.7538(3) 0.6327(2) 0.0231(6) Uani 1 1 d . . .
C15 C 0.14004(16) 0.7149(4) 0.55097(16) 0.0233(5) Uani 1 1 d . . .
N3 N 0.04951(15) 0.7345(3) 0.49660(14) 0.0375(6) Uani 1 1 d . . .
O7 O -0.0193(3) 0.7708(9) 0.5246(3) 0.0777(18) Uani 1 1 d . . .
O8 O 0.0492(3) 0.7188(10) 0.4263(3) 0.089(2) Uani 1 1 d . . .
C16 C 0.21949(16) 0.6615(4) 0.51959(16) 0.0225(5) Uani 1 1 d . . .
H1 H 0.7666(4) 0.6407(9) 0.9606(4) 0.0429(13) Uani 1 1 d . . .
H2 H 0.8733(4) 0.7451(8) 0.8711(4) 0.0396(15) Uani 1 1 d . . .
H3 H 0.8444(7) 0.905(2) 0.6002(4) 0.106(4) Uani 1 1 d . . .
H4 H 0.7328(7) 0.9492(17) 0.6124(5) 0.092(3) Uani 1 1 d . . .
H5 H 0.7686(11) 0.7137(15) 0.6041(6) 0.122(5) Uani 1 1 d . . .
H6 H 0.9545(5) 0.9317(11) 0.6984(4) 0.0602(17) Uani 1 1 d . . .
H7 H 0.9428(4) 0.9127(12) 0.7989(4) 0.0604(18) Uani 1 1 d . . .
H8 H 0.9538(5) 0.7033(12) 0.7433(6) 0.078(3) Uani 1 1 d . . .
H9 H 0.6367(5) 0.7896(11) 0.6762(4) 0.0577(18) Uani 1 1 d . . .
H10 H 0.5325(4) 0.6855(11) 0.7684(4) 0.0542(16) Uani 1 1 d . . .
H11 H 0.4522(4) 0.5461(9) 0.9399(4) 0.0430(13) Uani 1 1 d . . .
H12 H 0.3761(3) 0.6736(8) 0.6962(4) 0.0383(12) Uani 1 1 d . . .
H13 H 0.0786(4) 0.7963(9) 0.6551(4) 0.0422(13) Uani 1 1 d . . .
H15 H 0.2163(3) 0.6320(9) 0.4558(3) 0.0411(13) Uani 1 1 d . . .
H14 H 0.5235(9) 0.5564(17) 0.5686(7) 0.043(2) Uiso 0.55 1 d P . .
H13A H 0.4329(12) 0.4800(19) 0.4491(10) 0.043(2) Uiso 0.45 1 d P . .
 
loop_
 _atom_site_aniso_label
 _atom_site_aniso_U_11
 _atom_site_aniso_U_22
 _atom_site_aniso_U_33
 _atom_site_aniso_U_23
 _atom_site_aniso_U_13
 _atom_site_aniso_U_12
C1 0.0170(10) 0.0212(12) 0.0278(15) -0.0012(10) 0.0036(9) -0.0010(8)
C2 0.0170(11) 0.0207(13) 0.0316(15) -0.0017(10) 0.0066(10) -0.0016(8)
O1 0.0153(14) 0.048(2) 0.041(2) 0.0094(15) 0.0042(13) 0.0010(12)
O2 0.0165(13) 0.0413(18) 0.031(2) 0.0048(13) 0.0071(14) -0.0027(11)
C3 0.0161(10) 0.0231(13) 0.0239(15) 0.0001(10) 0.0040(10) 0.0010(8)
C4 0.0145(14) 0.0226(13) 0.0186(15) -0.0013(9) 0.0015(11) 0.0005(8)
C5 0.0193(12) 0.0202(13) 0.0208(15) 0.0004(10) 0.0026(11) 0.0011(9)
N1 0.0242(9) 0.0317(11) 0.0207(10) -0.0004(7) 0.0036(7) 0.0001(7)
C6 0.0438(17) 0.050(2) 0.0235(16) -0.0010(14) 0.0058(13) -0.0066(15)
C7 0.0204(12) 0.0420(18) 0.0322(18) 0.0058(13) 0.0086(12) 0.0022(11)
C8 0.0211(13) 0.0400(17) 0.0201(17) 0.0023(11) -0.0036(11) -0.0029(9)
C9 0.0191(13) 0.0330(14) 0.0279(16) 0.0014(11) -0.0007(10) -0.0011(10)
C10 0.0145(10) 0.0209(12) 0.0226(13) -0.0004(9) 0.0062(9) 0.0004(8)
C11 0.0155(11) 0.0223(13) 0.0257(14) 0.0013(10) 0.0052(9) 0.0014(8)
O3 0.0148(13) 0.0361(17) 0.0361(18) -0.0037(13) 0.0061(12) 0.0012(11)
O4 0.0280(16) 0.0315(18) 0.0248(19) -0.0064(11) 0.0135(14) -0.0005(10)
C12 0.0171(12) 0.0209(12) 0.0235(14) 0.0014(9) 0.0044(10) 0.0005(8)
C13 0.0248(14) 0.0196(13) 0.0195(16) 0.0009(9) 0.0058(12) 0.0016(8)
N2 0.0320(10) 0.0289(10) 0.0224(11) -0.0018(8) 0.0066(9) 0.0006(8)
O5 0.0377(18) 0.049(2) 0.0277(19) -0.0081(15) 0.0154(14) 0.0060(14)
O6 0.033(2) 0.057(2) 0.027(2) -0.0102(15) -0.0030(18) 0.0015(13)
C14 0.0205(15) 0.0291(16) 0.0206(16) 0.0001(9) 0.0063(13) 0.0010(8)
C15 0.0168(11) 0.0312(13) 0.0229(15) -0.0017(10) 0.0063(10) 0.0011(9)
N3 0.0185(10) 0.0672(16) 0.0275(14) -0.0008(9) 0.0059(9) 0.0059(8)
O7 0.019(2) 0.176(6) 0.039(3) -0.008(3) 0.007(2) 0.023(2)
O8 0.030(2) 0.205(7) 0.028(3) -0.018(3) -0.0042(18) 0.032(3)
C16 0.0155(11) 0.0284(14) 0.0243(16) -0.0014(10) 0.0055(9) 0.0008(8)
H1 0.029(3) 0.067(4) 0.033(4) 0.006(3) 0.006(2) 0.000(2)
H2 0.023(3) 0.056(4) 0.038(4) 0.010(2) -0.002(3) -0.0003(19)
H3 0.075(6) 0.208(13) 0.034(5) 0.024(6) 0.008(4) -0.025(7)
H4 0.083(6) 0.149(9) 0.035(4) 0.018(5) -0.018(4) 0.028(6)
H5 0.243(15) 0.071(6) 0.043(5) -0.014(4) 0.000(7) -0.048(7)
H6 0.046(3) 0.082(5) 0.056(4) 0.015(4) 0.018(3) -0.008(3)
H7 0.040(3) 0.093(6) 0.046(4) -0.003(4) 0.001(3) -0.011(3)
H8 0.051(4) 0.057(5) 0.123(8) 0.002(4) 0.008(4) 0.024(3)
H9 0.038(3) 0.099(5) 0.031(4) 0.023(3) -0.009(3) -0.011(3)
H10 0.031(3) 0.081(5) 0.046(4) 0.010(3) -0.004(3) -0.006(3)
H11 0.032(3) 0.046(3) 0.052(4) 0.014(3) 0.012(3) -0.004(2)
H12 0.021(2) 0.048(3) 0.043(3) -0.003(3) -0.003(2) 0.007(2)
H13 0.031(3) 0.054(4) 0.044(4) -0.002(3) 0.013(2) 0.009(2)
H15 0.034(3) 0.063(4) 0.028(3) -0.003(2) 0.010(2) 0.001(2)
 
_geom_special_details
;
 All s.u.'s (except the s.u. in the dihedral angle between two l.s. planes)
 are estimated using the full covariance matrix.  The cell s.u.'s are taken
 into account individually in the estimation of s.u.'s in distances, angles
 and torsion angles; correlations between s.u.'s in cell parameters are only
 used when they are defined by crystal symmetry.  An approximate (isotropic)
 treatment of cell s.u.'s is used for estimating s.u.'s involving l.s. planes.
;
 
loop_
 _geom_bond_atom_site_label_1
 _geom_bond_atom_site_label_2
 _geom_bond_distance
 _geom_bond_site_symmetry_2
 _geom_bond_publ_flag
C1 C9 1.397(4) . ?
C1 C3 1.401(3) . ?
C1 C2 1.465(3) . ?
C2 O2 1.227(4) . ?
C2 O1 1.313(4) . ?
C3 C4 1.395(4) . ?
C4 C5 1.406(4) . ?
C5 N1 1.369(3) . ?
C5 C8 1.414(4) . ?
N1 C7 1.447(3) . ?
N1 C6 1.451(4) . ?
C8 C9 1.389(4) . ?
C10 C16 1.392(3) . ?
C10 C12 1.394(3) . ?
C10 C11 1.497(3) . ?
C11 O4 1.246(4) . ?
C11 O3 1.268(4) . ?
C12 C13 1.391(4) . ?
C13 C14 1.378(4) . ?
C13 N2 1.470(3) . ?
N2 O6 1.206(5) . ?
N2 O5 1.227(4) . ?
C14 C15 1.391(4) . ?
C15 C16 1.392(3) . ?
C15 N3 1.470(3) . ?
N3 O8 1.182(5) . ?
N3 O7 1.196(5) . ?
 
loop_
 _geom_angle_atom_site_label_1
 _geom_angle_atom_site_label_2
 _geom_angle_atom_site_label_3
 _geom_angle
 _geom_angle_site_symmetry_1
 _geom_angle_site_symmetry_3
 _geom_angle_publ_flag
C9 C1 C3 118.3(2) . . ?
C9 C1 C2 121.6(2) . . ?
C3 C1 C2 120.1(2) . . ?
O2 C2 O1 121.9(3) . . ?
O2 C2 C1 122.4(2) . . ?
O1 C2 C1 115.7(3) . . ?
C4 C3 C1 121.2(2) . . ?
C3 C4 C5 120.8(2) . . ?
N1 C5 C4 120.9(2) . . ?
N1 C5 C8 121.5(3) . . ?
C4 C5 C8 117.6(2) . . ?
C5 N1 C7 121.3(2) . . ?
C5 N1 C6 120.2(2) . . ?
C7 N1 C6 115.2(2) . . ?
C9 C8 C5 121.3(3) . . ?
C8 C9 C1 120.9(2) . . ?
C16 C10 C12 120.3(2) . . ?
C16 C10 C11 120.0(2) . . ?
C12 C10 C11 119.7(2) . . ?
O4 C11 O3 123.9(3) . . ?
O4 C11 C10 118.4(2) . . ?
O3 C11 C10 117.7(2) . . ?
C13 C12 C10 118.6(2) . . ?
C14 C13 C12 123.2(3) . . ?
C14 C13 N2 117.9(2) . . ?
C12 C13 N2 118.9(2) . . ?
O6 N2 O5 124.7(3) . . ?
O6 N2 C13 117.8(3) . . ?
O5 N2 C13 117.5(2) . . ?
C13 C14 C15 116.5(2) . . ?
C14 C15 C16 122.9(2) . . ?
C14 C15 N3 117.3(2) . . ?
C16 C15 N3 119.8(2) . . ?
O8 N3 O7 123.1(3) . . ?
O8 N3 C15 117.5(3) . . ?
O7 N3 C15 119.3(3) . . ?
C10 C16 C15 118.5(2) . . ?
 
loop_
 _geom_hbond_atom_site_label_D
 _geom_hbond_atom_site_label_H
 _geom_hbond_atom_site_label_A
 _geom_hbond_distance_DH
 _geom_hbond_distance_HA
 _geom_hbond_distance_DA
 _geom_hbond_angle_DHA
 _geom_hbond_site_symmetry_A
O1 H11 O2  1.009(7) 1.613(7) 2.621(5) 178.3(6) 3_667
O3 H14 O4  0.957(16) 1.696(15) 2.651(4) 175.0(11) 3_666
O4 H13A O3  0.92(2) 1.74(2) 2.651(4) 174.6(13) 3_666

_refine_diff_density_max    0.622
_refine_diff_density_min   -0.607
_refine_diff_density_rms    0.151
